# Supplementary material for: Halogen Bonding in N-Alkyl-3-halogenopyridinium Salts
Source: MDPI journal article supplement (doi:10.3390/cryst11101240), 2021-10-14
Supplement: s1 [file s1]

# Halogen bonding in *N*-alkyl-3-halogenopyridinium salts

Luka Fotović and Vladimir Stilinović

Department of Chemistry, Faculty of Science, University of Zagreb, Horvatovac 102a, HR-10002 Zagreb, Croatia; euran@chem.pmf.hr (E.U.), lfotovic@chem.pmf.hr (L.F.), nbedekovic@chem.pmf.hr (N.B.), vstilinovic@chem.pmf.hr (V.S.), dominik@chem.pmf.hr (D.C.)

Correspondence: vstilinovic@chem.pmf.hr (V.S.); Tel.: +385-1-4606-371 (V.S.)

## Table of Content

| Item                                                                                 | Page |
|--------------------------------------------------------------------------------------|------|
| Figures S1–S8 (ORTEP representations of the formula units of the prepared compounds) | 1    |
| Figures S9–S14 (PXRD patterns of the prepared compounds)                             | 5    |
| Figures S17–S20 (DSC curves of the prepared compounds)                               | 8    |
| Figures S21–S26 (IR spectra (ATR) of prepared compounds)                             | 11   |
| Table S1 (Crystallographic data)                                                     | 13   |

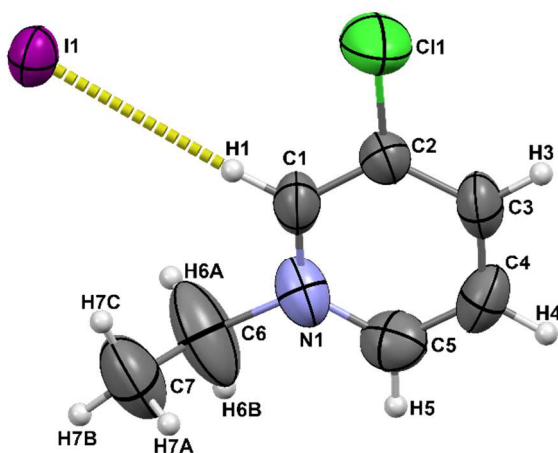

**Figure S1.** Molecular structure of [N-Et-3-ClPy]I showing the atom-labelling scheme. Displacement ellipsoids are drawn at the 50 % probability level, and H atoms are shown as small spheres of arbitrary radius.

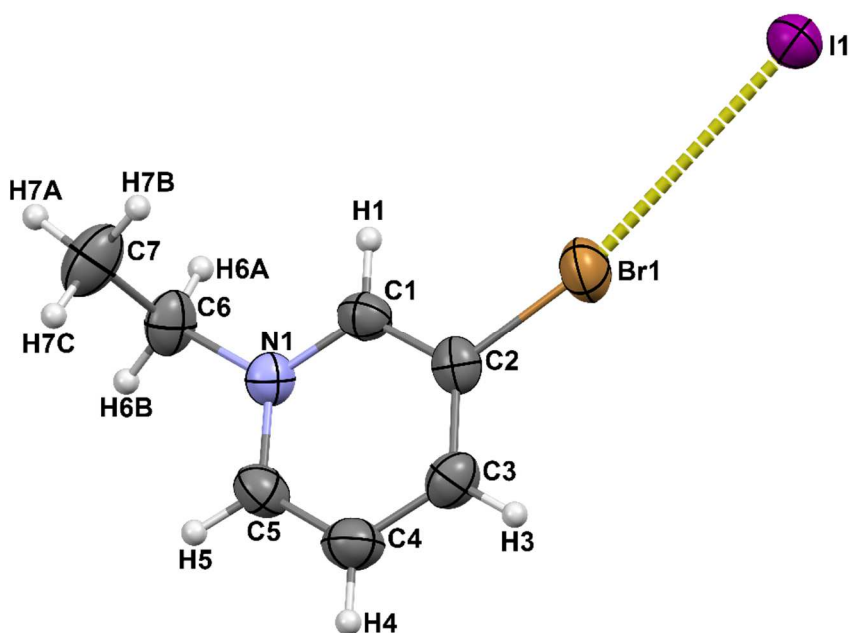

**Figure S2.** Molecular structure of [N-Et-3-BrPy]I showing the atom-labelling scheme. Displacement ellipsoids are drawn at the 50 % probability level, and H atoms are shown as small spheres of arbitrary radius.

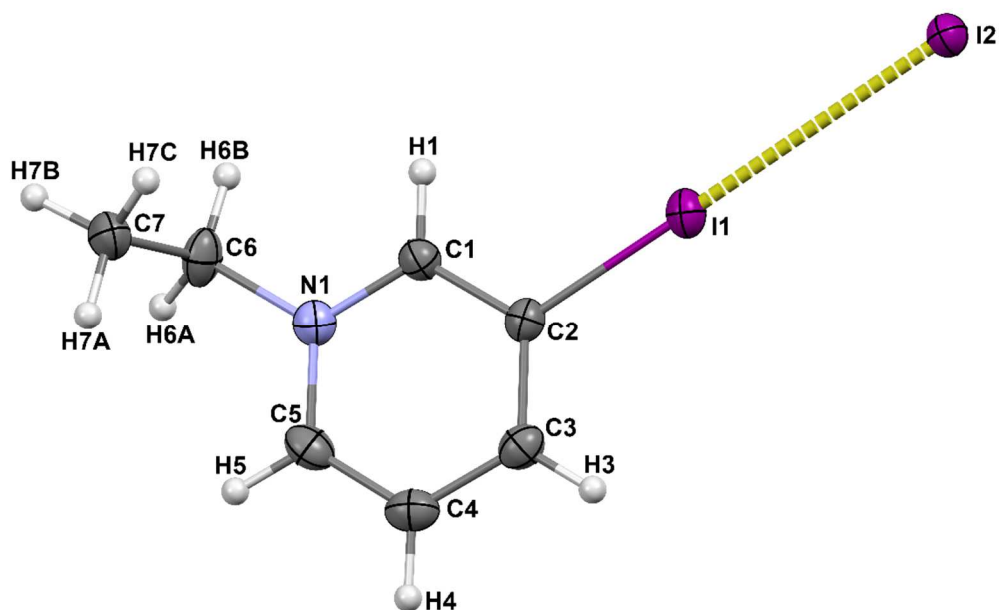

**Figure S3.** Molecular structure of [N-Et-3-IPy]I showing the atom-labelling scheme. Displacement ellipsoids are drawn at the 50 % probability level, and H atoms are shown as small spheres of arbitrary radius.

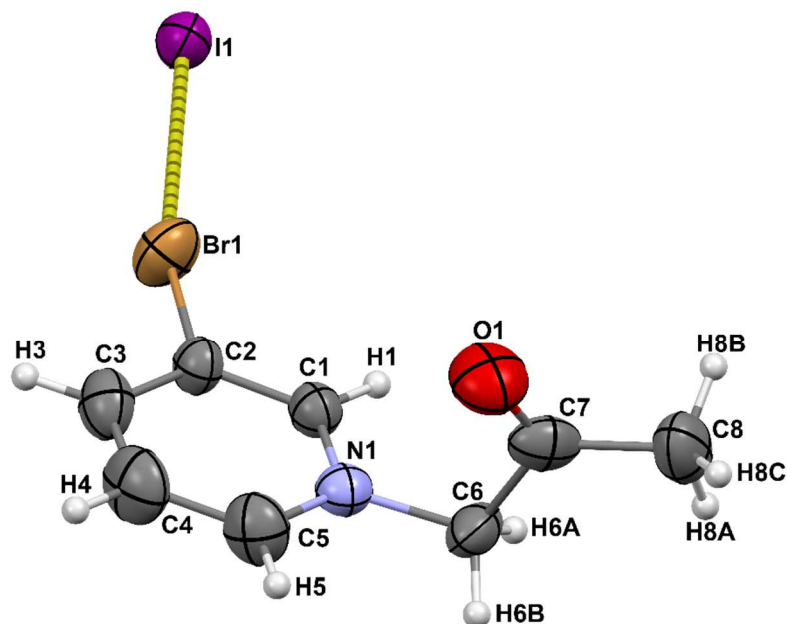

**Figure S4.** Molecular structure of [N-Ace-3-ClPy]I showing the atom-labelling scheme. Displacement ellipsoids are drawn at the 50 % probability level, and H atoms are shown as small spheres of arbitrary radius.

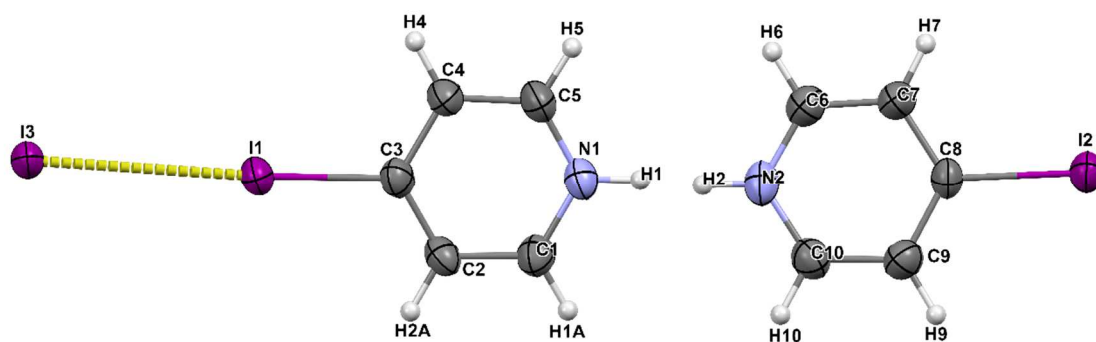

**Figure S5.** Molecular structure of [4-IPy]<sub>2</sub>HI showing the atom-labelling scheme. Displacement ellipsoids are drawn at the 50 % probability level, and H atoms are shown as small spheres of arbitrary radius.

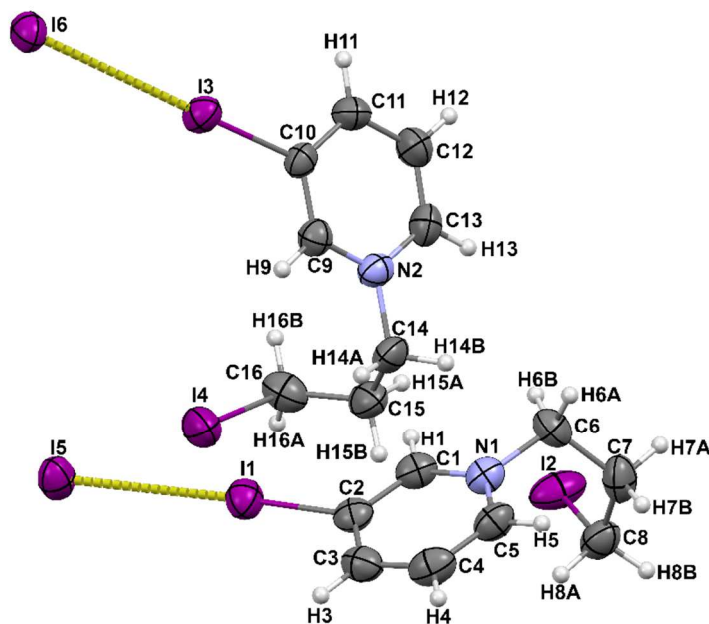

**Figure S6.** Molecular structure of [N-PropI-3-IPy]I showing the atom-labelling scheme. Displacement ellipsoids are drawn at the 50 % probability level, and H atoms are shown as small spheres of arbitrary radius.

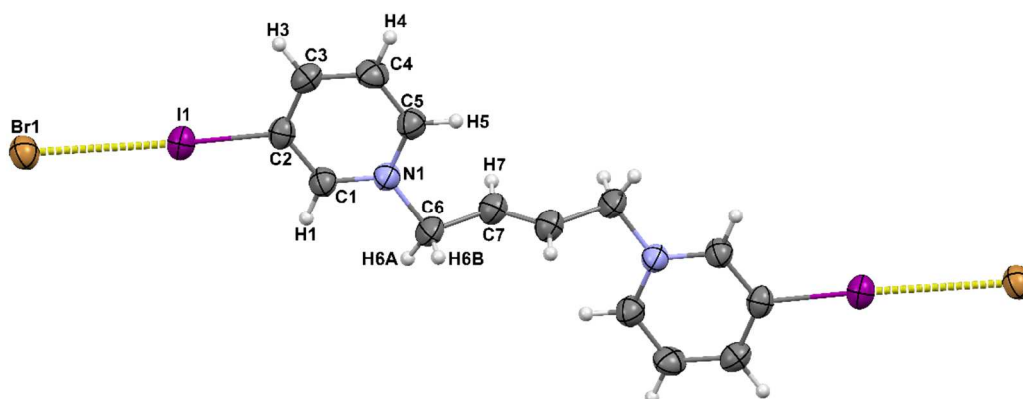

**Figure S7.** Molecular structure of  $[N,N'\text{-Buen-(3-IPy)}_2]\text{Br}_2$  showing the atom-labelling scheme. Displacement ellipsoids are drawn at the 50 % probability level, and H atoms are shown as small spheres of arbitrary radius.

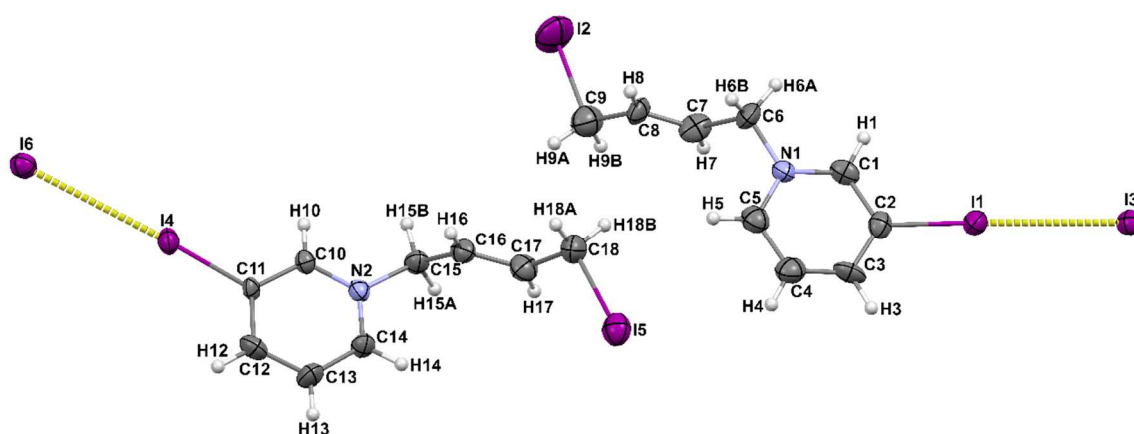

**Figure S8.** Molecular structure of  $[N\text{-BuenI-3-IPy}]\text{I}$  showing the atom-labelling scheme. Displacement ellipsoids are drawn at the 50 % probability level, and H atoms are shown as small spheres of arbitrary radius.

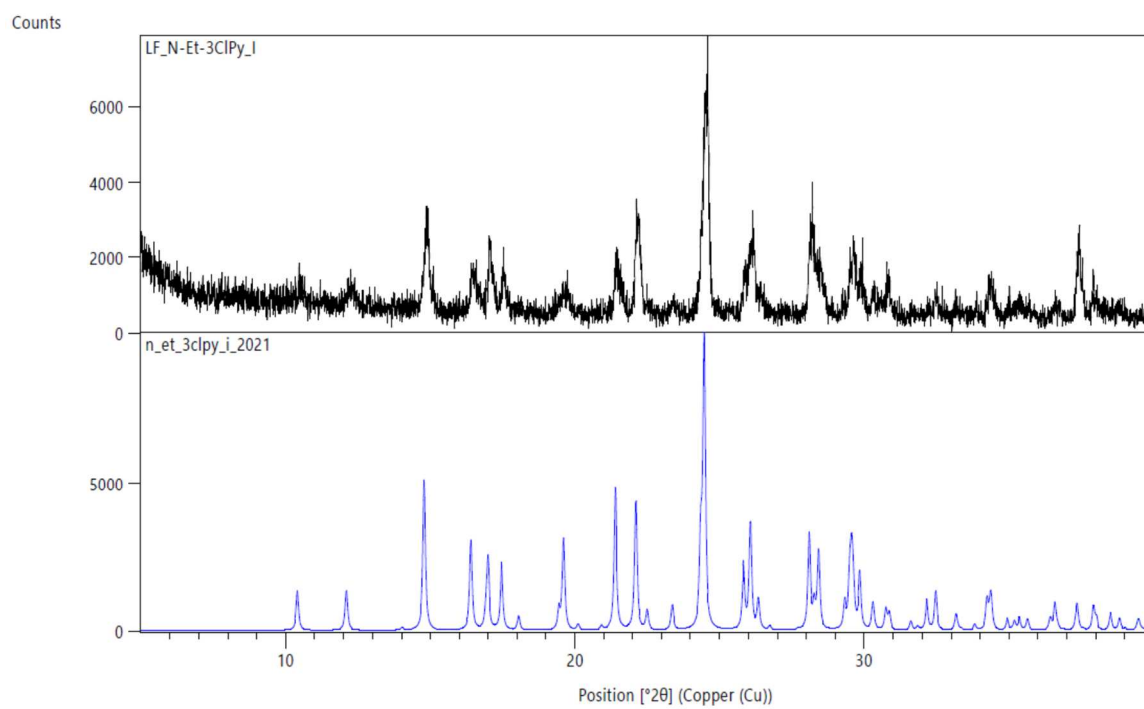

**Figure S9.** Measured (black) and calculated (blue) PXRd patterns of [N-Et-3-ClPy]I.

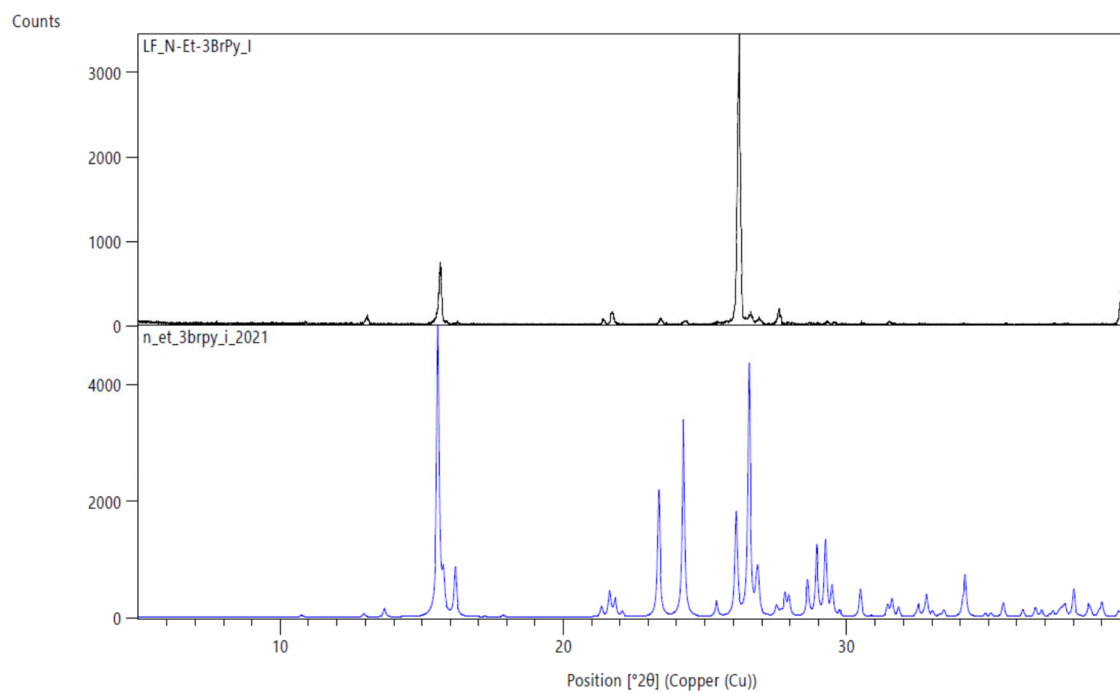

**Figure S10.** Measured (black) and calculated (blue) PXRd patterns of [N-Et-3-BrPy]I.

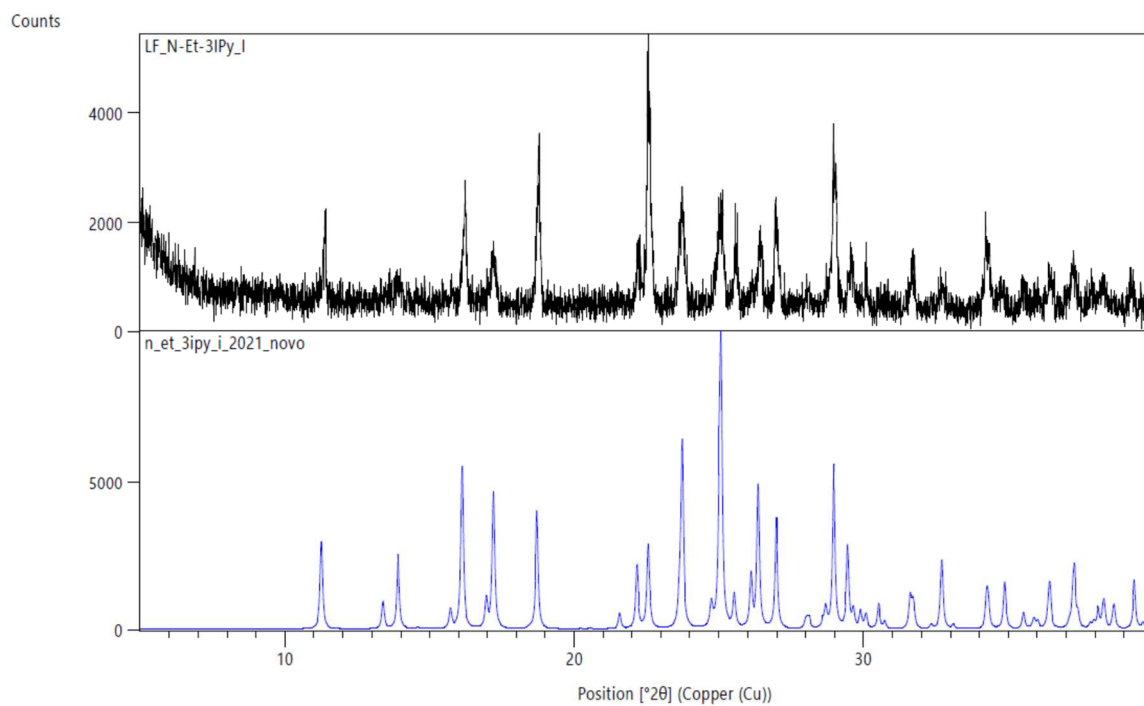

**Figure S11.** Measured (black) and calculated (blue) PXRD patterns of [N-Et-3-IPy]I.

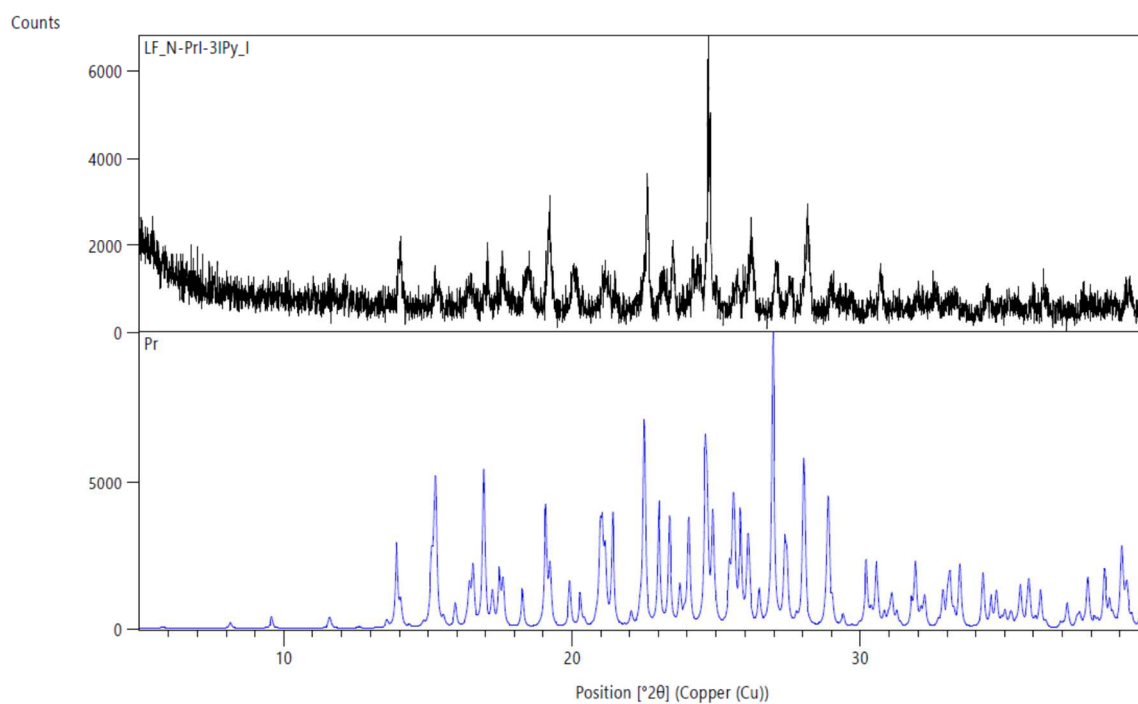

**Figure S12.** Measured (black) and calculated (blue) PXRD patterns of [N-PropI-3-IPy]Br.

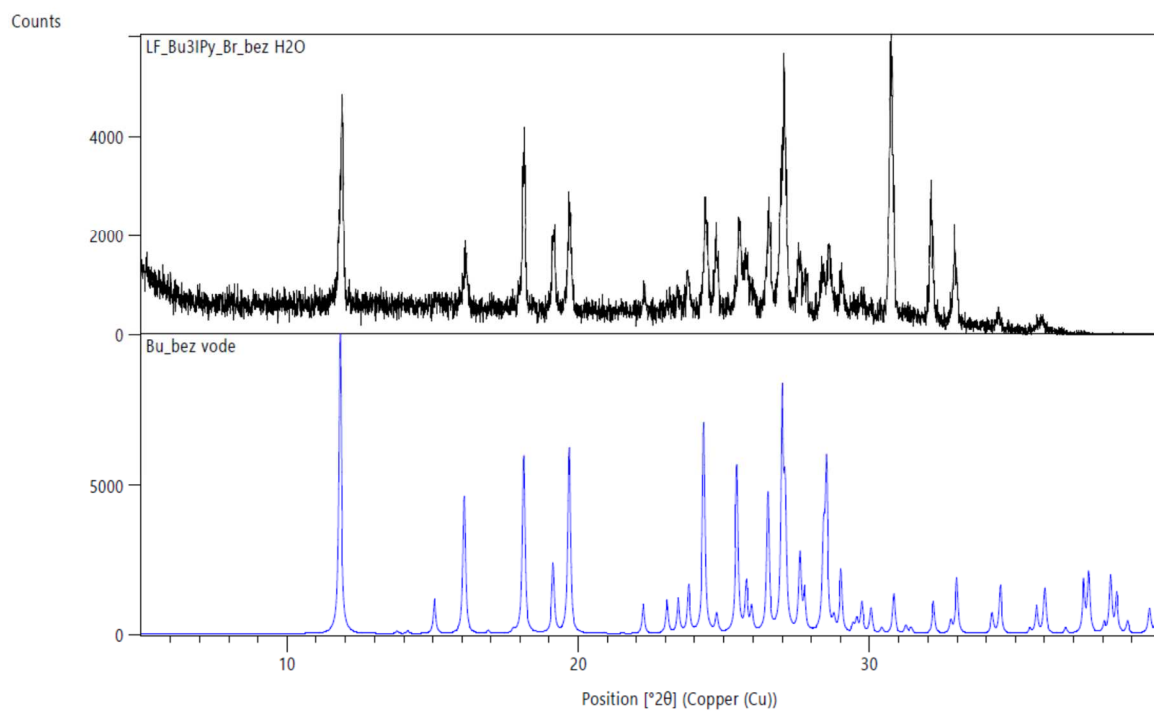

**Figure S13.** Measured (black) and calculated (blue) PXRD patterns of  $[N,N'\text{-Buen}-(3\text{-IPy})_2]\text{Br}_2$ .

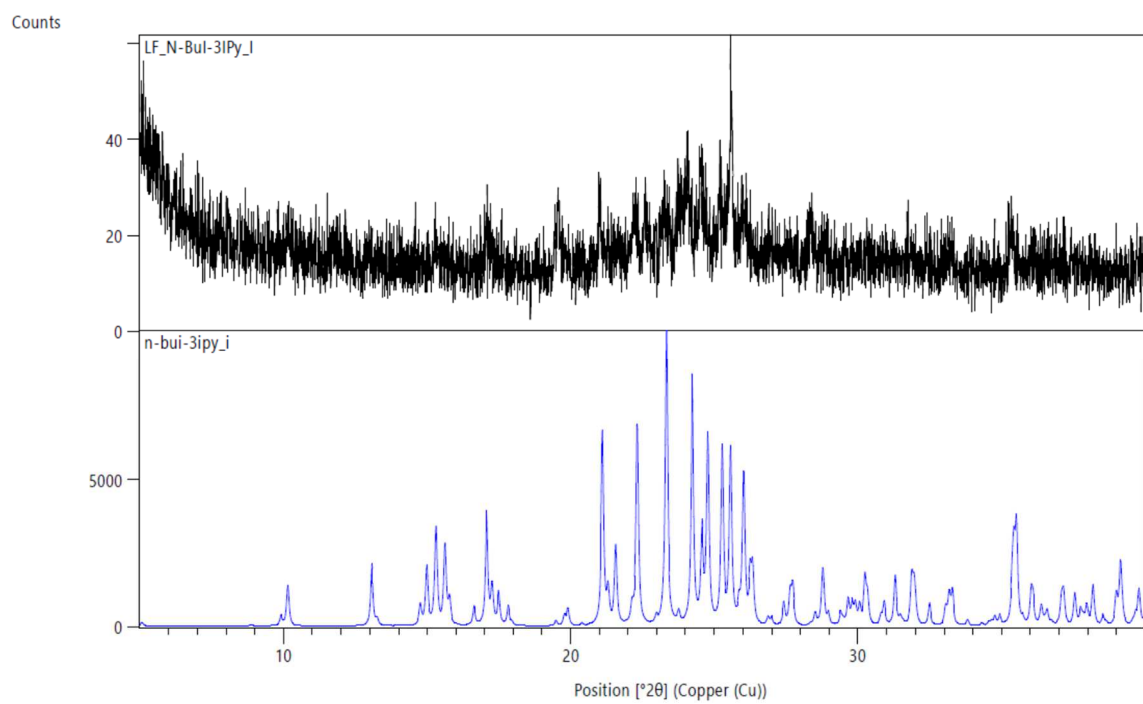

**Figure S14.** Measured (black) and calculated (blue) PXRD patterns of  $[N\text{-BuenI-3-IPy}]\text{I}$ .



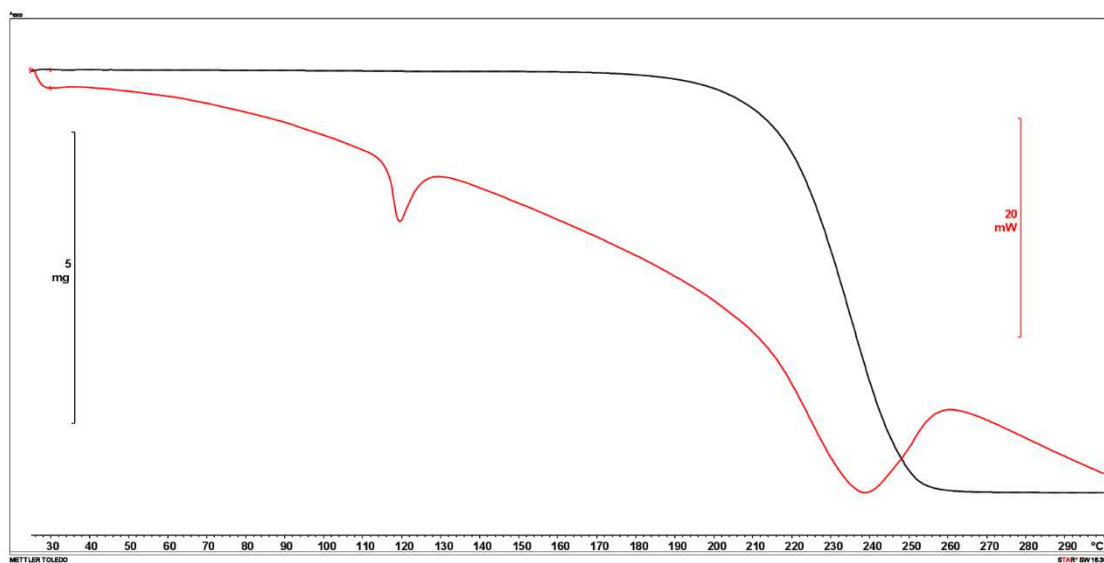

**Figure S15.** TG (black) and DSC (red) thermograms of [N-Et-3-ClPy]I.

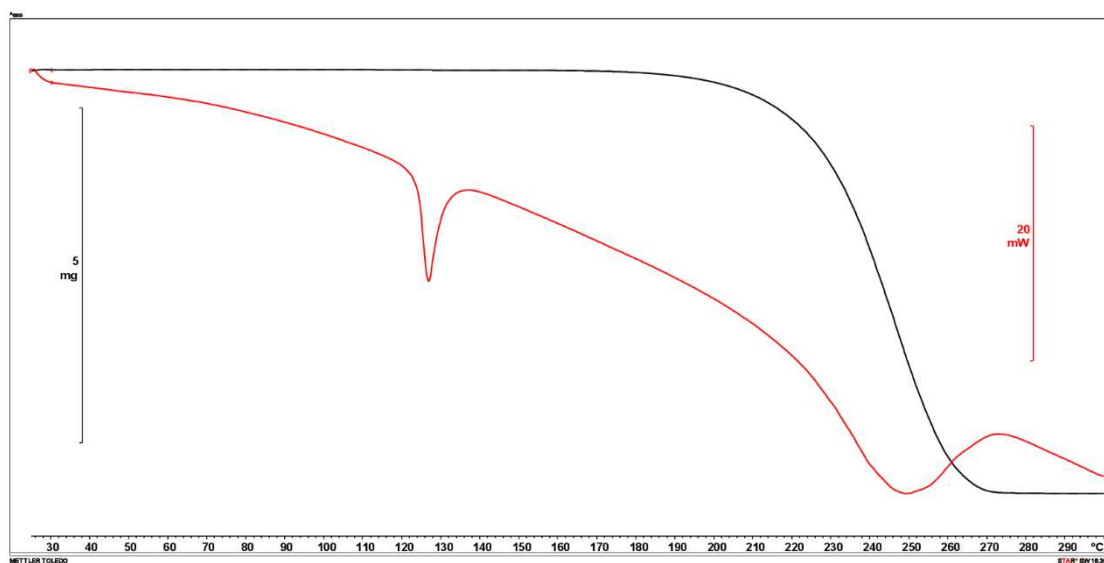

**Figure S16.** TG (black) and DSC (red) thermograms of [N-Et-3-BrPy]I.

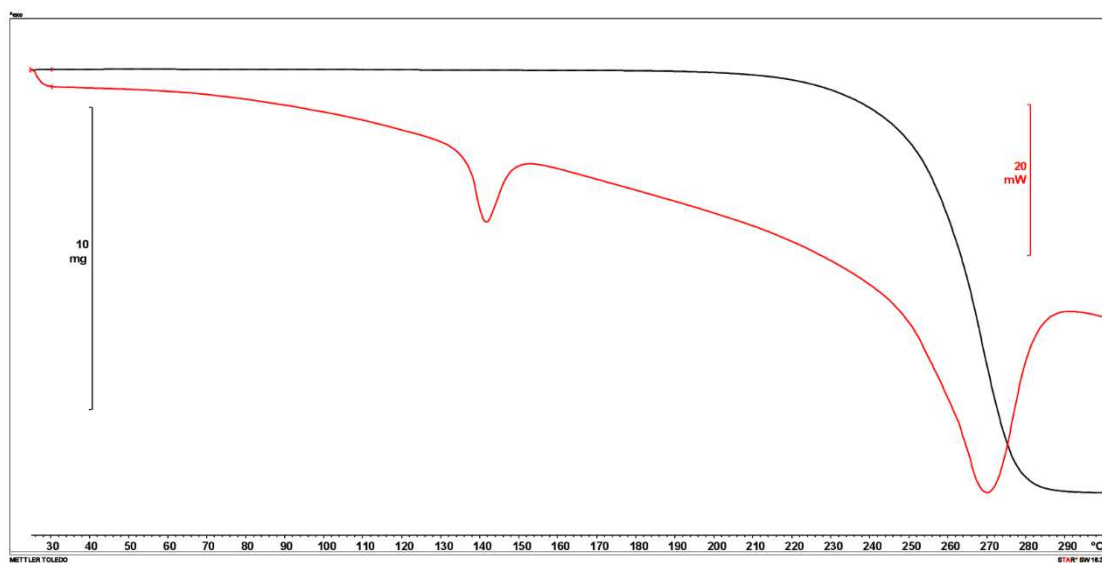

**Figure S17.** TG (black) and DSC (red) thermograms of [N-Et-3-IPy]I.

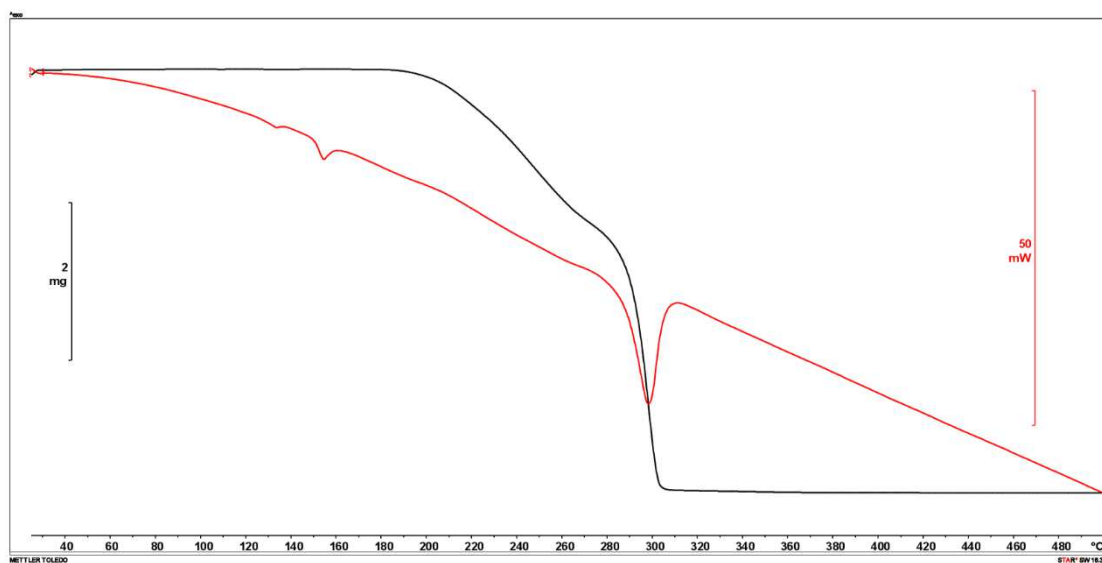

**Figure S18.** TG (black) and DSC (red) thermograms of [N-PropI-3-IPy]I.

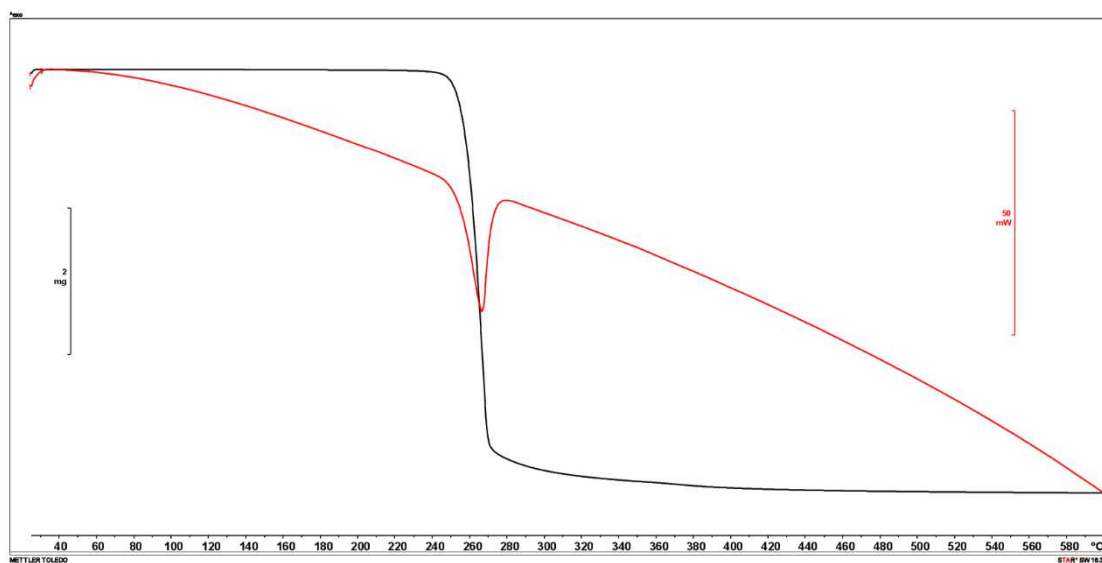

**Figure S19.** TG (black) and DSC (red) thermograms of  $[N,N'\text{-Buen-(3-IPy)}_2]\text{Br}_2$ .

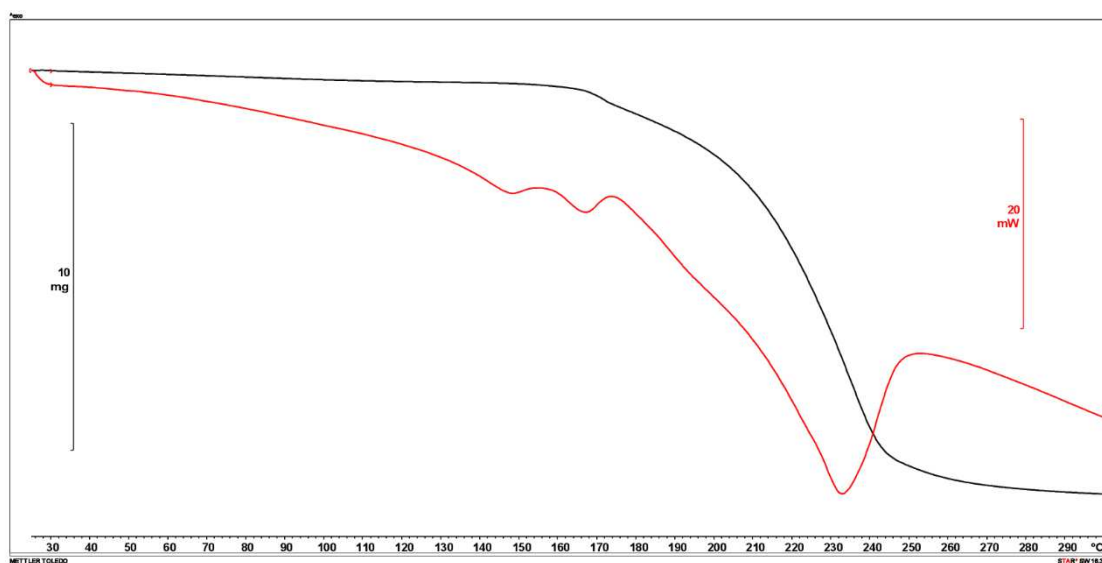

**Figure S20.** TG (black) and DSC (red) thermograms of  $[N\text{-BuenI-3-IPy}]\text{I}$ .

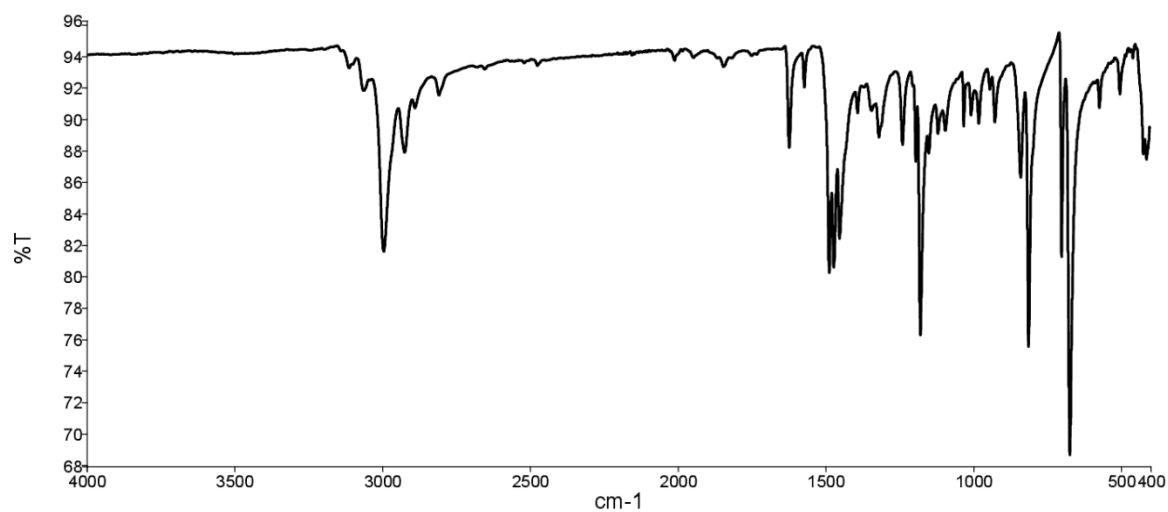

**Figure S21.** IR spectrum (ATR) of [N-Et-3-ClPy]I.

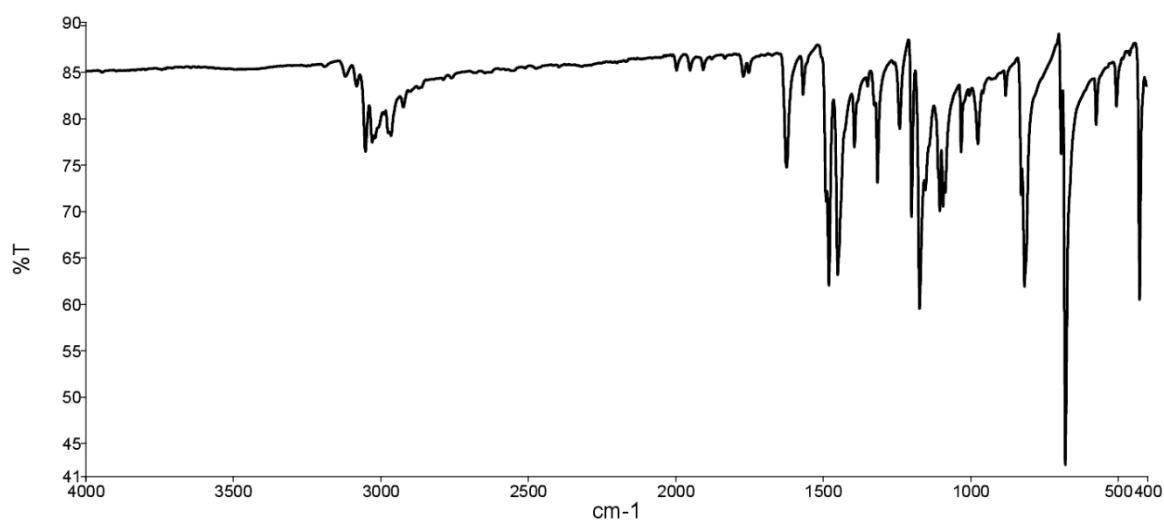

**Figure S22.** IR spectrum (ATR) of [N-Et-3-BrPy]I.

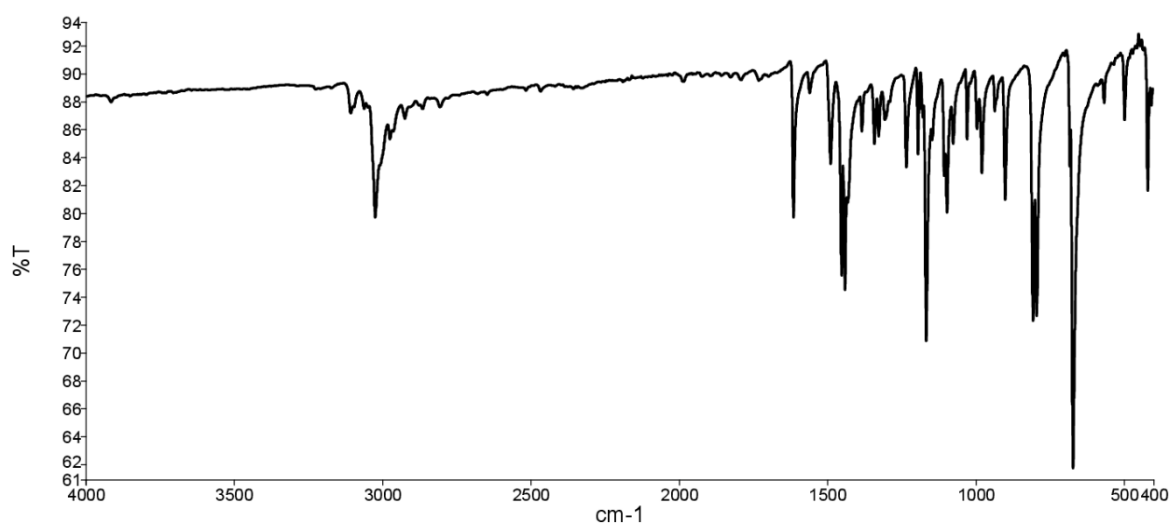

**Figure S23.** IR spectrum (ATR) of [N-Et-3-IPy]I.

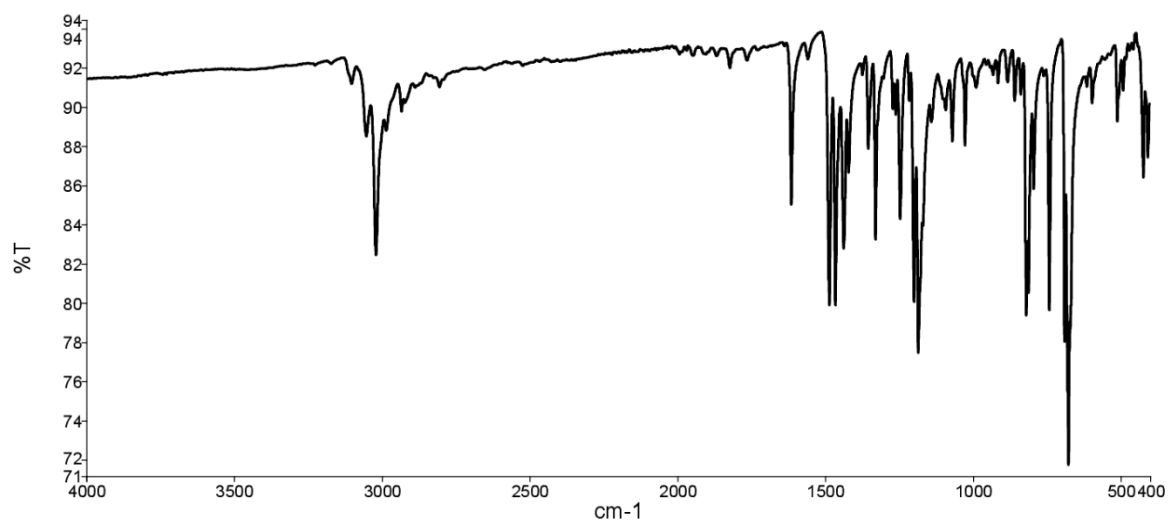

**Figure S24.** IR spectrum (ATR) of [N-Propyl-3-IPy]I.

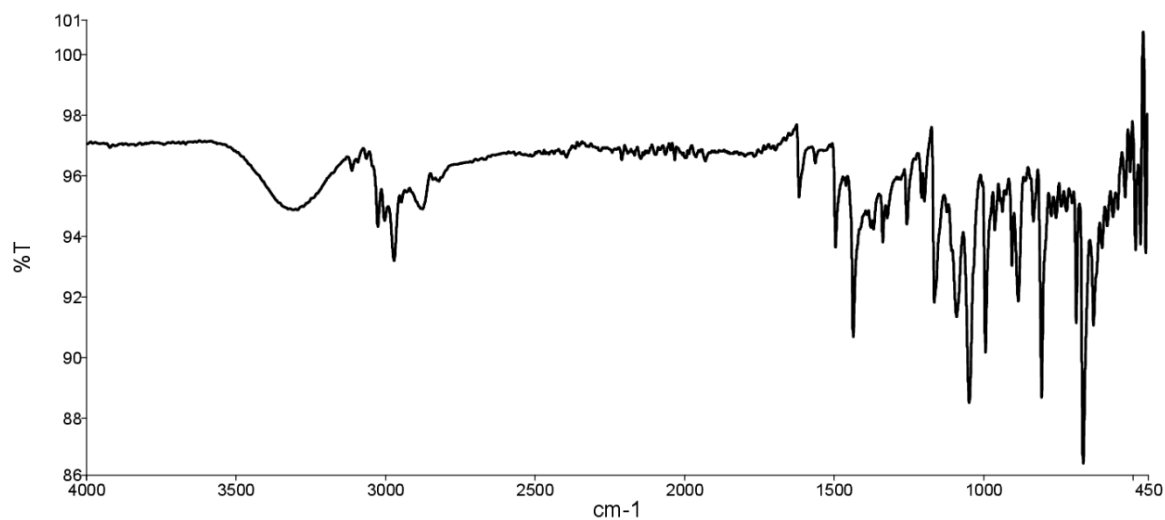

**Figure S25.** IR spectrum (ATR) of [N,N'-Buen-(3-IPy)<sub>2</sub>]Br<sub>2</sub>.

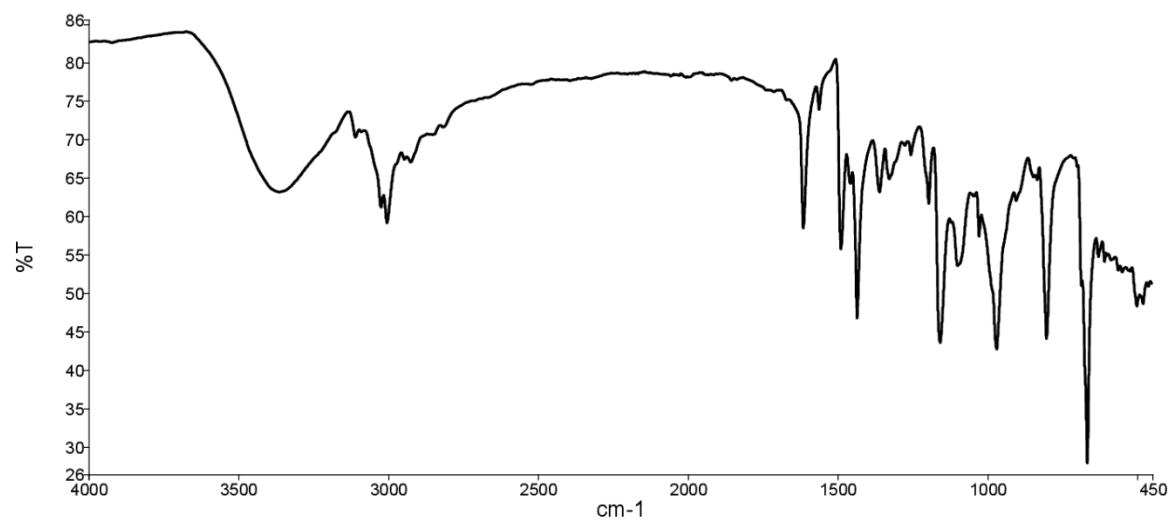

**Figure S26.** IR spectrum (ATR) of [N-Buenl-3-IPy]I.

**Table S1.** An overview and crystallographic data of the prepared compounds.

|                                                                        | [ <i>N</i> -Et- <b>3-ClPy</b> ]I   | [ <i>N</i> -Et- <b>3-BrPy</b> ]I   | [ <i>N</i> -Et- <b>3-IPy</b> ]I                | [ <i>N</i> -Ace- <b>3-IPy</b> ]I    |
|------------------------------------------------------------------------|------------------------------------|------------------------------------|------------------------------------------------|-------------------------------------|
| Molecular formula                                                      | C <sub>7</sub> H <sub>9</sub> ClIN | C <sub>7</sub> H <sub>9</sub> BrIN | C <sub>7</sub> H <sub>9</sub> I <sub>2</sub> N | C <sub>8</sub> H <sub>9</sub> ONIBr |
| $M_r$                                                                  | 269.5                              | 314.0                              | 361.0                                          | 342.0                               |
| Crystal system                                                         | monoclinic                         | monoclinic                         | monoclinic                                     | monoclinic                          |
| Space group                                                            | $P 2_1/c$                          | $P 2_1/n$                          | $P 2_1/n$                                      | $P 2_1/n$                           |
| Crystal data:                                                          |                                    |                                    |                                                |                                     |
| $a / \text{\AA}$                                                       | 6.3486(3)                          | 6.8018(4)                          | 7.88120(10)                                    | 8.8788(6)                           |
| $b / \text{\AA}$                                                       | 10.4216(5)                         | 10.2748(5)                         | 12.1185(2)                                     | 7.0447(4)                           |
| $c / \text{\AA}$                                                       | 14.7025(7)                         | 13.8404(8)                         | 10.2971(2)                                     | 17.4511(9)                          |
| $\alpha / ^\circ$                                                      | 90                                 | 90                                 | 90                                             | 90                                  |
| $\beta / ^\circ$                                                       | 96.626(4)                          | 99.623(5)                          | 91.892(2)                                      | 95.905(5)                           |
| $\gamma / ^\circ$                                                      | 90                                 | 90                                 | 90                                             | 90                                  |
| $V / \text{\AA}^3$                                                     | 966.26(5)                          | 953.66(8)                          | 982.92(1)                                      | 504.55(5)                           |
| $Z$                                                                    | 4                                  | 4                                  | 4                                              | 4                                   |
| $D_{\text{calc}} / \text{g cm}^{-3}$                                   | 1.85                               | 2.19                               | 2.44                                           | 2.09                                |
| $\lambda(\text{MoK}\alpha) / \text{\AA}$                               | 0.71073                            | 0.71073                            | 0.71073                                        | 0.71073                             |
| $T / \text{K}$                                                         | 295                                | 295                                | 295                                            | 295                                 |
| Crystal size / mm <sup>3</sup>                                         | 0.15 x 0.04 x 0.03                 | 0.14 x 0.02 x 0.01                 | 0.14 x 0.14 x 0.12                             | 0.08 x 0.08 x 0.09                  |
| $\mu / \text{mm}^{-1}$                                                 | 3.524                              | 7.481                              | 6.334                                          | 6.587                               |
| $F(000)$                                                               | 512                                | 584                                | 656                                            | 640                                 |
| Refl. collected/unique                                                 | 6548 / 1878                        | 6712 / 2069                        | 34119 / 2860                                   | 5525 / 2116                         |
| Data parameters                                                        | 92                                 | 93                                 | 93                                             | 118                                 |
| $\Delta\rho_{\text{max}}, \Delta\rho_{\text{min}} / \text{e \AA}^{-3}$ | 1.029; -2.368                      | 1.948; -1.726                      | 0.700; -0.685                                  | 0.491; -1.043                       |
| $R[F^2 > 4\sigma(F^2)]$                                                | 0.056                              | 0.044                              | 0.023                                          | 0.035                               |
| $wR(F^2)$                                                              | 0.131                              | 0.125                              | 0.051                                          | 0.076                               |
| Goodness-of-fit, $S$                                                   | 1.097                              | 1.095                              | 1.089                                          | 0.939                               |

**Table S1.** Continued.

|                                                                         | [4-IPy] <sub>2</sub> HI                                      | [ <i>N</i> -PropI-3-IPy]I                       | [ <i>N,N'</i> -Buen-(3-IPy) <sub>2</sub> ]Br <sub>2</sub>                     | [ <i>N</i> -BuenI-3-IPy]I                       |
|-------------------------------------------------------------------------|--------------------------------------------------------------|-------------------------------------------------|-------------------------------------------------------------------------------|-------------------------------------------------|
| Molecular formula                                                       | C <sub>10</sub> H <sub>9</sub> I <sub>3</sub> N <sub>2</sub> | C <sub>8</sub> H <sub>10</sub> I <sub>3</sub> N | C <sub>14</sub> H <sub>14</sub> Br <sub>2</sub> I <sub>2</sub> N <sub>2</sub> | C <sub>9</sub> H <sub>10</sub> I <sub>3</sub> N |
| <i>M</i> <sub>r</sub>                                                   | 537.9                                                        | 1001.8                                          | 623.9                                                                         | 618.18                                          |
| Crystal system                                                          | monoclinic                                                   | monoclinic                                      | monoclinic                                                                    | triclinic                                       |
| Space group                                                             | <i>P</i> 2 <sub>1</sub> / <i>n</i>                           | <i>P</i> 2 <sub>1</sub> / <i>n</i>              | <i>P</i> 2 <sub>1</sub> / <i>n</i>                                            | <i>P</i> n a 2 <sub>1</sub>                     |
| Crystal data:                                                           |                                                              |                                                 |                                                                               |                                                 |
| <i>a</i> / Å                                                            | 6.8903(4)                                                    | 7.2177(2)                                       | 7.7257(13)                                                                    | 34.8020(14)                                     |
| <i>b</i> / Å                                                            | 17.6755(10)                                                  | 30.4077(11)                                     | 11.5890(18)                                                                   | 10.3728(4)                                      |
| <i>c</i> / Å                                                            | 13.2376(11)                                                  | 11.6116(4)                                      | 9.7976(18)                                                                    | 7.3369(3)                                       |
| <i>α</i> / °                                                            | 90                                                           | 90                                              | 90                                                                            | 90                                              |
| <i>β</i> / °                                                            | 100.199(7)                                                   | 93.483(3)                                       | 93.698(16)                                                                    | 90                                              |
| <i>γ</i> / °                                                            | 90                                                           | 90                                              | 90                                                                            | 90                                              |
| <i>V</i> / Å <sup>3</sup>                                               | 1361.24(15)                                                  | 2543.73(5)                                      | 875.38(9)                                                                     | 2648.58(2)                                      |
| <i>Z</i>                                                                | 4                                                            | 8                                               | 2                                                                             | 8                                               |
| <i>D</i> <sub>calc</sub> / g cm <sup>−3</sup>                           | 2.322                                                        | 2.62                                            | 2.37                                                                          | 2.57                                            |
| <i>λ</i> (MoK <sub>α</sub> ) / Å                                        | 0.71073                                                      | 0.71073                                         | 0.71073                                                                       | 0.71073                                         |
| <i>T</i> / K                                                            | 170                                                          | 295                                             | 295                                                                           | 295                                             |
| Crystal size / mm <sup>3</sup>                                          | 0.06 x 0.04 x 0.01                                           | 0.02 x 0.02 x 0.11                              | 0.07 x 0.02 x 0.005                                                           | 0.10 x 0.12 x 0.14                              |
| <i>μ</i> / mm <sup>−1</sup>                                             | 6.861                                                        | 7.330                                           | 8.149                                                                         | 7.044                                           |
| <i>F</i> (000)                                                          | 968                                                          | 1792                                            | 986                                                                           | 1840                                            |
| Refl. collected/unique                                                  | 3031 / 1576                                                  | 106756 / 106756                                 | 12567 / 1916                                                                  | 16254 / 5018                                    |
| Data parameters                                                         | 136                                                          | 218                                             | 91                                                                            | 235                                             |
| <i>Δρ</i> <sub>max</sub> , <i>Δρ</i> <sub>min</sub> / e Å <sup>−3</sup> | 0.391; −1.074                                                | 1.882; −1.556                                   | 0.659; −0.895                                                                 | 1.327; −1.380                                   |
| <i>R</i> [ <i>F</i> <sup>2</sup> > 4σ( <i>F</i> <sup>2</sup> )]         | 0.072                                                        | 0.041                                           | 0.030                                                                         | 0.044                                           |
| w <i>R</i> ( <i>F</i> <sup>2</sup> )                                    | 0.066                                                        | 0.077                                           | 0.073                                                                         | 0.102                                           |
| Goodness-of-fit, <i>S</i>                                               | 1.057                                                        | 0.970                                           | 0.993                                                                         | 1.059                                           |
